# Supplementary material
Source: HighWire-hosted journal article supplement (https://ard.bmj.com/content/76/8/1365)
Supplement: inline-supplementary-material-1 [file inline-supplementary-material-1.xlsx]

## Sheet: Web Appendix 1
Web appendix Table 1. Prevalence, years lived with disability (YLDs) and disability adjusted life year (DALYs) of musculoskeletal disorders for all ages and both sexes in the Easter Mediterranean countries, 2013
Musculoskeletal disorder	Country	Prevalence Per 1000			YLDs Per 100,000			DALYs Per 100,000
		Value	95% uncertainty interval		Rate	95% uncertainty interval		Rate	95% uncertainty interval
Gout	Afghanistan	0.264319	0.301074	0.222683	0.85554	1.23351	0.548131	0.85554	1.23351	0.548131
Gout	Bahrain	0.580816	0.68268	0.471579	1.90987	2.83893	1.21465	1.90987	2.83893	1.21465
Gout	Djibouti	0.166831	0.186445	0.146661	0.557914	0.803743	0.364494	0.557914	0.803743	0.364494
Gout	Egypt	0.477317	0.550631	0.397815	1.5469	2.17263	1.00862	1.5469	2.17263	1.00862
Gout	Iran	0.768506	0.850439	0.691904	2.47919	3.47305	1.61005	2.47919	3.47305	1.61005
Gout	Iraq	0.328148	0.377251	0.281304	1.0606	1.50092	0.70724	1.0606	1.50092	0.70724
Gout	Jordan	0.435358	0.497851	0.366452	1.40811	1.96983	0.942414	1.40811	1.96983	0.942414
Gout	Kuwait	0.402769	0.472857	0.327341	1.33923	1.96715	0.841393	1.33923	1.96715	0.841393
Gout	Lebanon	0.697827	0.796893	0.572345	2.2145	3.13215	1.46727	2.2145	3.13215	1.46727
Gout	Libya	0.488311	0.563977	0.413484	1.58535	2.34472	1.03065	1.58535	2.34472	1.03065
Gout	Morocco	0.521335	0.603248	0.449009	1.69905	2.39358	1.11829	1.69905	2.39358	1.11829
Gout	Oman	0.397717	0.472782	0.320146	1.30612	1.89446	0.857664	1.30612	1.89446	0.857664
Gout	Pakistan	0.090431	0.101117	0.079962	0.304648	0.431147	0.201294	0.304648	0.431147	0.201294
Gout	Palestine	0.322187	0.370051	0.262669	1.05551	1.5407	0.675553	1.05551	1.5407	0.675553
Gout	Qatar	0.637589	0.764925	0.512621	2.12053	3.20687	1.29149	2.12053	3.20687	1.29149
Gout	Saudi Arabia	0.534953	0.62747	0.437403	1.7289	2.43036	1.09333	1.7289	2.43036	1.09333
Gout	Somalia	0.119531	0.133097	0.105905	0.399104	0.570057	0.257178	0.399104	0.570057	0.257178
Gout	Sudan	0.326925	0.376557	0.275285	1.05844	1.52544	0.691668	1.05844	1.52544	0.691668
Gout	Syria	0.430322	0.492431	0.358693	1.389	1.94337	0.904394	1.389	1.94337	0.904394
Gout	Tunisia	0.653514	0.747259	0.555523	2.11456	2.99997	1.40091	2.11456	2.99997	1.40091
Gout	United Arab Emirates	0.406023	0.492622	0.311944	1.37445	2.15063	0.836242	1.37445	2.15063	0.836242
Gout	Yemen	0.295919	0.341931	0.25134	0.968825	1.36957	0.627558	0.968825	1.36957	0.627558
Low back pain	Afghanistan	53.1016	65.4478	43.1927	587.967	867.484	378.809	587.967	867.484	378.809
Low back pain	Bahrain	86.5737	108.389	67.7687	968.737	1422.99	609.134	968.737	1422.99	609.134
Low back pain	Djibouti	50.1918	54.3522	45.6386	557.703	776.366	374.264	557.703	776.366	374.264
Low back pain	Egypt	135.991	152.442	120.049	1512.65	2156.06	1006.42	1512.65	2156.06	1006.42
Low back pain	Iran	100.208	108.119	93.6467	1117.71	1543.73	753.956	1117.71	1543.73	753.956
Low back pain	Iraq	60.7281	77.9744	47.2042	676.252	994.249	418.436	676.252	994.249	418.436
Low back pain	Jordan	72.3669	90.1469	57.6949	806.775	1215.34	500.128	806.775	1215.34	500.128
Low back pain	Kuwait	28.2075	32.9105	23.6977	317.5	450.278	208.486	317.5	450.278	208.486
Low back pain	Lebanon	35.8332	38.3925	33.2575	396.634	548.598	268.736	396.634	548.598	268.736
Low back pain	Libya	80.827	99.7908	60.1878	896.798	1313.33	539.862	896.798	1313.33	539.862
Low back pain	Morocco	99.3081	105.445	93.653	1109.32	1534.04	750.115	1109.32	1534.04	750.115
Low back pain	Oman	79.3713	104.464	57.0199	891.902	1358.11	526.403	891.902	1358.11	526.403
Low back pain	Pakistan	54.8952	59.385	50.9813	613.67	852.071	413.416	613.67	852.071	413.416
Low back pain	Palestine	61.3447	72.6714	48.3904	684.994	997.709	439.168	684.994	997.709	439.168
Low back pain	Qatar	90.4191	118.121	64.2632	1021.26	1508.29	613.864	1021.26	1508.29	613.864
Low back pain	Saudi Arabia	89.3911	104.483	75.1517	990.634	1410.42	644.211	990.634	1410.42	644.211
Low back pain	Somalia	38.415	41.589	35.1894	426.356	587.624	286.199	426.356	587.624	286.199
Low back pain	Sudan	75.8006	85.7547	65.6132	843.841	1190.39	555.088	843.841	1190.39	555.088
Low back pain	Syria	68.9978	91.8168	53.8093	765.528	1166.03	462.022	765.528	1166.03	462.022
Low back pain	Tunisia	80.1001	85.6048	75.231	895.92	1246.67	609.487	895.92	1246.67	609.487
Low back pain	United Arab Emirates	84.9318	94.4646	75.1777	970.207	1393.52	632.026	970.207	1393.52	632.026
Low back pain	Yemen	57.0745	70.5251	44.327	637.36	928.907	402.577	637.36	928.907	402.577
Neck pain	Afghanistan	27.3361	31.2143	22.5426	265.721	373.69	179.172	265.721	373.69	179.172
Neck pain	Bahrain	43.5363	49.5523	35.5723	427.384	609.845	286.138	427.384	609.845	286.138
Neck pain	Djibouti	43.9974	50.6325	37.3276	431.948	600.417	284.217	431.948	600.417	284.217
Neck pain	Egypt	41.505	48.6525	34.8245	404.087	571.183	270.597	404.087	571.183	270.597
Neck pain	Iran	49.7108	53.9236	45.7787	486.423	675.37	334.829	486.423	675.37	334.829
Neck pain	Iraq	32.1458	37.262	27.1646	314.83	440.235	209.314	314.83	440.235	209.314
Neck pain	Jordan	36.0259	41.3189	30.162	352.122	503.071	237.627	352.122	503.071	237.627
Neck pain	Kuwait	40.8668	47.4099	34.4453	403.848	567.039	263.762	403.848	567.039	263.762
Neck pain	Lebanon	45.4473	49.8099	40.1147	442.783	616.641	302.959	442.783	616.641	302.959
Neck pain	Libya	41.9352	48.1652	35.9736	409.429	578.806	273.523	409.429	578.806	273.523
Neck pain	Morocco	44.3195	51.6075	37.2445	433.569	602.837	288.144	433.569	602.837	288.144
Neck pain	Oman	36.3757	42.1512	30.9551	358.935	504.863	238.848	358.935	504.863	238.848
Neck pain	Pakistan	27.638	31.5222	24.1456	272.044	380.183	183.683	272.044	380.183	183.683
Neck pain	Palestine	31.1848	36.2802	26.3723	305.889	437.63	204.156	305.889	437.63	204.156
Neck pain	Qatar	43.4662	50.6178	36.1688	431.08	611.236	284.222	431.08	611.236	284.222
Neck pain	Saudi Arabia	39.4732	45.371	33.0771	384.455	544.701	253.707	384.455	544.701	253.707
Neck pain	Somalia	33.2043	39.1259	27.935	325.586	465.574	218.527	325.586	465.574	218.527
Neck pain	Sudan	31.798	36.7176	26.9943	309.73	426.243	212.824	309.73	426.243	212.824
Neck pain	Syria	36.5418	42.1523	31.1344	356.995	502.614	244.827	356.995	502.614	244.827
Neck pain	Tunisia	47.9636	55.7579	39.9296	470.436	670.518	316.286	470.436	670.518	316.286
Neck pain	United Arab Emirates	39.1774	46.2672	30.1131	391.37	561.998	252.501	391.37	561.998	252.501
Neck pain	Yemen	30.5667	35.2054	25.944	300.168	417.648	200.112	300.168	417.648	200.112
Osteoarthritis	Afghanistan	14.6929	15.4954	13.805	88.9285	123.349	62.7985	88.9285	123.349	62.7985
Osteoarthritis	Bahrain	21.1954	22.5268	19.9868	130.064	177.871	90.2255	130.064	177.871	90.2255
Osteoarthritis	Djibouti	23.4494	24.4239	22.4872	143.052	194.605	100.223	143.052	194.605	100.223
Osteoarthritis	Egypt	29.181	30.8306	27.4546	176.695	241.708	124.312	176.695	241.708	124.312
Osteoarthritis	Iran	29.5954	31.2385	27.821	180.694	249.323	123.32	180.694	249.323	123.32
Osteoarthritis	Iraq	18.7401	19.8772	17.5472	113.821	155.451	77.9819	113.821	155.451	77.9819
Osteoarthritis	Jordan	20.6986	22.079	19.3666	126.212	175.109	87.5751	126.212	175.109	87.5751
Osteoarthritis	Kuwait	18.0396	19.1876	16.9204	111.426	154.059	77.4134	111.426	154.059	77.4134
Osteoarthritis	Lebanon	32.7378	34.4814	30.9464	197.903	271.079	136.658	197.903	271.079	136.658
Osteoarthritis	Libya	26.5487	28.1526	24.7883	161.284	219.543	112.955	161.284	219.543	112.955
Osteoarthritis	Morocco	30.1322	31.9417	28.3866	184.328	249.391	127.896	184.328	249.391	127.896
Osteoarthritis	Oman	15.6241	16.5088	14.7268	94.7231	129.824	65.9858	94.7231	129.824	65.9858
Osteoarthritis	Pakistan	15.7785	16.5168	15.0373	95.8177	129.65	67.1193	95.8177	129.65	67.1193
Osteoarthritis	Palestine	17.195	18.1594	16.1544	104.918	142.291	72.8272	104.918	142.291	72.8272
Osteoarthritis	Qatar	15.5802	16.7383	14.4683	97.0607	134.916	67.2401	97.0607	134.916	67.2401
Osteoarthritis	Saudi Arabia	24.3135	25.6439	23.0683	147.244	201.58	101.611	147.244	201.58	101.611
Osteoarthritis	Somalia	17.1592	17.8354	16.4311	104.387	142.081	72.8279	104.387	142.081	72.8279
Osteoarthritis	Sudan	18.512	19.6112	17.3135	112.094	152.38	79.155	112.094	152.38	79.155
Osteoarthritis	Syria	22.5399	23.9273	21.2336	136.817	185.259	95.3883	136.817	185.259	95.3883
Osteoarthritis	Tunisia	37.3312	39.3591	35.1555	229.119	314.148	159.07	229.119	314.148	159.07
Osteoarthritis	United Arab Emirates	9.74924	10.4886	9.02499	61.2105	84.5872	42.0922	61.2105	84.5872	42.0922
Osteoarthritis	Yemen	16.434	17.4395	15.3408	100.444	137.633	69.4605	100.444	137.633	69.4605
Rheumatoid arthritis	Afghanistan	1.54038	1.61653	1.47097	36.6774	49.2823	26.0488	58.7263	101.96	37.6001
Rheumatoid arthritis	Bahrain	1.99652	2.08617	1.90365	47.609	62.8687	33.517	57.0283	73.4556	42.5313
Rheumatoid arthritis	Djibouti	2.24113	2.32662	2.1492	53.179	70.9001	37.8342	61.7307	79.7377	44.7592
Rheumatoid arthritis	Egypt	0.922159	1.00189	0.84668	21.3168	28.3342	15.1216	22.7527	29.6883	16.5335
Rheumatoid arthritis	Iran	1.48623	1.58744	1.3939	35.0756	46.5309	24.9253	41.0356	52.9574	30.7582
Rheumatoid arthritis	Iraq	0.666366	0.744258	0.594278	15.8753	21.4832	11.0134	17.2382	22.913	12.214
Rheumatoid arthritis	Jordan	0.673887	0.735785	0.612067	16.1137	21.5537	11.0055	17.5816	23.1532	12.4653
Rheumatoid arthritis	Kuwait	0.734335	0.809621	0.666935	17.6353	23.97	12.1418	18.5958	24.9604	13.0168
Rheumatoid arthritis	Lebanon	2.06142	2.18241	1.9381	48.1777	63.9838	33.9898	51.8576	67.2724	37.4329
Rheumatoid arthritis	Libya	1.48444	1.5814	1.39261	34.9665	46.7834	24.7181	38.6503	50.9747	28.142
Rheumatoid arthritis	Morocco	1.5647	1.6833	1.44599	36.7062	48.0851	26.0166	41.0573	52.7921	30.2625
Rheumatoid arthritis	Oman	0.809187	0.885578	0.742161	19.5394	27.0812	13.6076	20.3145	27.8762	14.4057
Rheumatoid arthritis	Pakistan	1.57479	1.66128	1.49054	36.8692	48.7198	26.1971	45.6245	58.832	34.2366
Rheumatoid arthritis	Palestine	1.47379	1.55204	1.39235	35.4238	46.8438	25.1842	46.2426	59.1072	35.1776
Rheumatoid arthritis	Qatar	1.77112	1.89038	1.65645	42.793	57.6905	29.882	51.1143	66.1949	37.0896
Rheumatoid arthritis	Saudi Arabia	0.575226	0.621908	0.530743	13.4674	17.9515	9.39508	14.5089	18.9618	10.331
Rheumatoid arthritis	Somalia	1.86284	1.94656	1.79646	44.3501	58.6782	31.3635	52.2894	67.9147	38.0838
Rheumatoid arthritis	Sudan	1.28922	1.37005	1.20571	30.55	40.4855	21.6194	35.6349	45.6676	26.2556
Rheumatoid arthritis	Syria	1.33343	1.43469	1.24334	31.5063	42.1585	22.0243	32.5675	43.5607	23.2231
Rheumatoid arthritis	Tunisia	1.79137	1.91139	1.67144	42.3038	55.4592	29.7418	46.6722	59.9026	33.6316
Rheumatoid arthritis	United Arab Emirates	0.880593	0.984644	0.789578	21.508	29.5238	14.6685	23.3906	31.5647	16.2185
Rheumatoid arthritis	Yemen	1.32659	1.40608	1.25369	31.7654	42.3622	22.4203	37.6425	49.8631	26.5956
Other musculoskeletal disorders	Afghanistan	9.4143	13.0189	5.4532	85.0073	139.868	45.3518	123.023	186.946	72.8408
Other musculoskeletal disorders	Bahrain	28.4012	36.2172	21.1316	259.242	382.655	163.061	304.793	431.473	207.284
Other musculoskeletal disorders	Djibouti	21.5917	27.1184	16.2571	195.852	288.623	122.674	239.278	332.272	164.443
Other musculoskeletal disorders	Egypt	27.1963	33.1826	21.2015	245.024	355.125	158.944	260.656	369.595	173.995
Other musculoskeletal disorders	Iran	26.5864	32.6145	20.9149	241.903	347.322	154.228	262.442	367.044	171.731
Other musculoskeletal disorders	Iraq	15.171	19.3482	9.77808	137.928	205.529	81.6122	157.27	225.592	99.6531
Other musculoskeletal disorders	Jordan	24.7895	30.2173	19.2391	224.9	327.384	144.635	263.969	363.462	181.383
Other musculoskeletal disorders	Kuwait	21.5407	28.0348	15.8083	198.663	298.728	117.584	213.924	314.177	132.461
Other musculoskeletal disorders	Lebanon	17.1836	27.3818	10.6809	156.114	271.708	83.7488	184.534	297.144	110.671
Other musculoskeletal disorders	Libya	24.7151	31.9109	18.3249	223.748	337.183	141.781	256.737	369.289	174.693
Other musculoskeletal disorders	Morocco	27.2025	34.1817	20.8897	247.732	363.872	160.089	277.092	393.989	188.67
Other musculoskeletal disorders	Oman	15.4128	19.5297	11.6082	140.92	208.701	88.9242	155.174	223.564	103.36
Other musculoskeletal disorders	Pakistan	18.6303	23.0351	14.6623	170.149	245.92	109.759	200.397	275.788	138.226
Other musculoskeletal disorders	Palestine	20.9068	26.2133	15.6295	190.084	280.928	120.26	247.046	341.14	176.674
Other musculoskeletal disorders	Qatar	18.5858	25.7419	12.2567	171.724	272.035	96.99	196.101	296.424	122.744
Other musculoskeletal disorders	Saudi Arabia	20.0287	26.27	15.2814	180.69	267.106	112.01	198.373	283.976	128.342
Other musculoskeletal disorders	Somalia	15.7514	21.3265	9.78912	142.296	220.789	79.9561	166.542	251.522	102.594
Other musculoskeletal disorders	Sudan	21.9593	27.1425	16.3946	198.695	289.236	128.163	215.335	306.266	144.978
Other musculoskeletal disorders	Syria	15.083	22.8306	7.40809	137.582	236.329	62.0158	138.387	237.142	63.2191
Other musculoskeletal disorders	Tunisia	30.4547	37.375	24.6045	278.195	402.463	184.635	297.657	420.014	202.502
Other musculoskeletal disorders	United Arab Emirates	18.1604	25.0136	12.1364	169.78	267.021	97.9012	198.259	295.579	124.4
Other musculoskeletal disorders	Yemen	15.3537	19.1217	11.6233	139.883	203.286	88.288	158.4	226.26	106.071
